# Supplementary material for: Multiple pathways for glucose phosphate transport and utilization support growth of Cryptosporidium parvum
Source: PubMed Central journal article supplement (PMC10774378; doi:10.1038/s41467-024-44696-3), 2024-01-09
Supplement: 41467_2024_44696_MOESM3_ESM.pdf [file 41467_2024_44696_MOESM3_ESM.pdf]

## Description of Additional Supplementary Files

File Name: Supplementary Data 1

Description: Summary of *C. parvum* proteins identified by LC-MS/MS analysis.

File Name: Supplementary Data 2

Description: Oligonucleotides and plasmids used in this study.

File Name: Supplementary Movie 1

Description: **Fluorescent intensity CpGT1-mNeon-mCh during merogony using time lapse microscopy.** CpGT1-mNeon-mCh sporozoite that invaded into HCT-8 cells and underwent the entire merogony cycle. The video is recorded from 10 min before invasion to 12 h post invasion with an interval of 1 image every 10 min. Scale bars = 5  $\mu$ m.
